# Supplementary material
Source: PubMed Central journal article supplement (PMC3162432)

**THE  $\alpha$  SUBUNIT OF THE G PROTEIN  $G_{13}$  REGULATES THE ACTIVITY OF ONE OR MORE GLI TRANSCRIPTION FACTORS INDEPENDENTLY OF SMOOTHENED\***

**Andrew E. Douglas<sup>1</sup>, Jennifer A. Heim<sup>2</sup>, Feng Shen<sup>1</sup>, Luciana L. Amada<sup>2</sup>, Natalia A. Riobo<sup>3</sup>, Martin E. Fernández-Zapico<sup>2</sup>, and David R. Manning<sup>1</sup>**

<sup>1</sup>From the Department of Pharmacology, University of Pennsylvania School of Medicine, Philadelphia, Pennsylvania 19104, <sup>2</sup>Schulze Center for Novel Therapeutics, Mayo Clinic, Rochester, Minnesota 55905, and <sup>3</sup>Department of Biochemistry and Molecular Biology and Kimmel Cancer Center, Thomas Jefferson University, Philadelphia, Pennsylvania 19107

Running head: Activation of Gli by  $G_{13}$

**Address correspondence to:** David R. Manning, PhD, Department of Pharmacology, University of Pennsylvania School of Medicine, 3620 Hamilton Walk, Philadelphia, PA 19104-6084. Fax: 215-573-2236; E-mail: manning@mail.med.upenn.edu

**Supplemental Material**

**Supplemental Figure Legend**

Fig S1. Smoothened couples to  $G\alpha_i$  but does not couple to  $G\alpha_{13}$ . *A)* HEK293 cells were transfected with vector for Smo or the 5-HT<sub>1A</sub> receptor, or with empty vector (pcDNA). At 48 h, membranes were isolated and [<sup>35</sup>S]GTP $\gamma$ S binding to endogenous  $G\alpha_i$  was evaluated with or without 10  $\mu$ M purmorphamine (Smo) or 1  $\mu$ M 8-OH-DPAT (5-HT<sub>1A</sub> receptor). *B)* HEK293 cells were transfected with vector for Smo or TP $\alpha$ , or with empty vector, and [<sup>35</sup>S]GTP $\gamma$ S binding to endogenous  $G\alpha_{13}$  in subsequently prepared membranes was evaluated with or without 10  $\mu$ M purmorphamine (Smo) or 10  $\mu$ M U46619 (TP $\alpha$ ). *C)* HEK293 cells were transfected with vector for Smo· $G\alpha_{13}$  or TP $\alpha$ · $G\alpha_{13}$ , or with empty vector, and [<sup>35</sup>S]GTP $\gamma$ S binding was evaluated in subsequently prepared membranes with or without agonists. Data in each panel represent a typical experiment performed in triplicate.

# Supplemental Figures

## Figure S1.

### A. Coupling to endogenous $G\alpha_i$

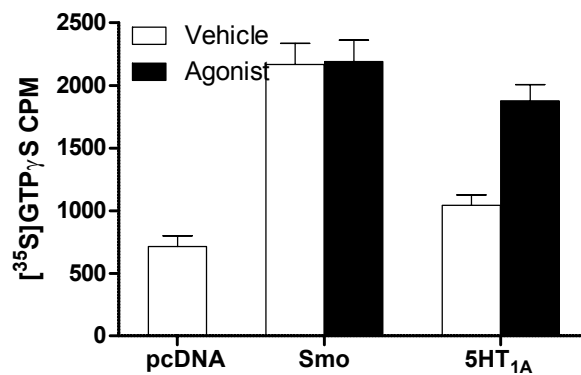

### B. Coupling to endogenous $G\alpha_{13}$

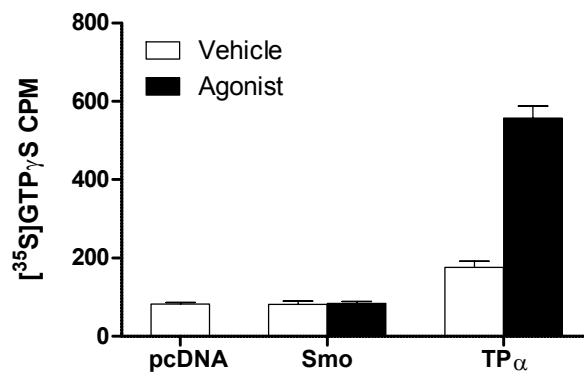

### C. Coupling to fused $G\alpha_{13}$

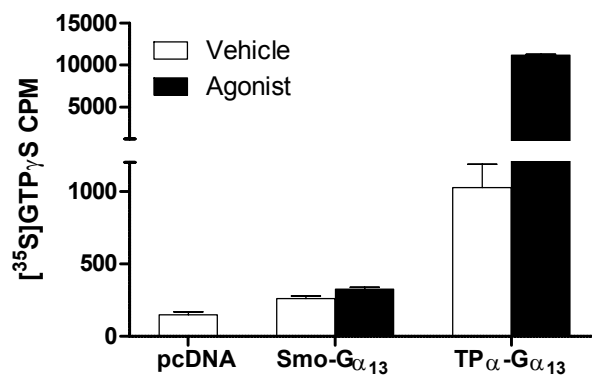

Supplement: supp_M111.219279_jbc.M111.219279-1.pdf [file supp_M111.219279_jbc.M111.219279-1.pdf]
